# Supplementary material
Source: PubMed Central journal article supplement (PMC10110579)
Supplement: 41531_2023_497_MOESM1_ESM.pdf [file 41531_2023_497_MOESM1_ESM.pdf]

## **Supplemental Tables and Figures**

**Supplemental Figure 1.** Flow of research participants

**Supplemental Table 1.** Comparison of cognitive and speech performance on smartphone assessments between those with and without Parkinson's disease

**Supplemental Table 2.** Description and location of assessments conducted with the digital devices used in the study

**Supplemental Table 3.** Sources of missing data

## Supplemental Figure 1. Flow of research participants

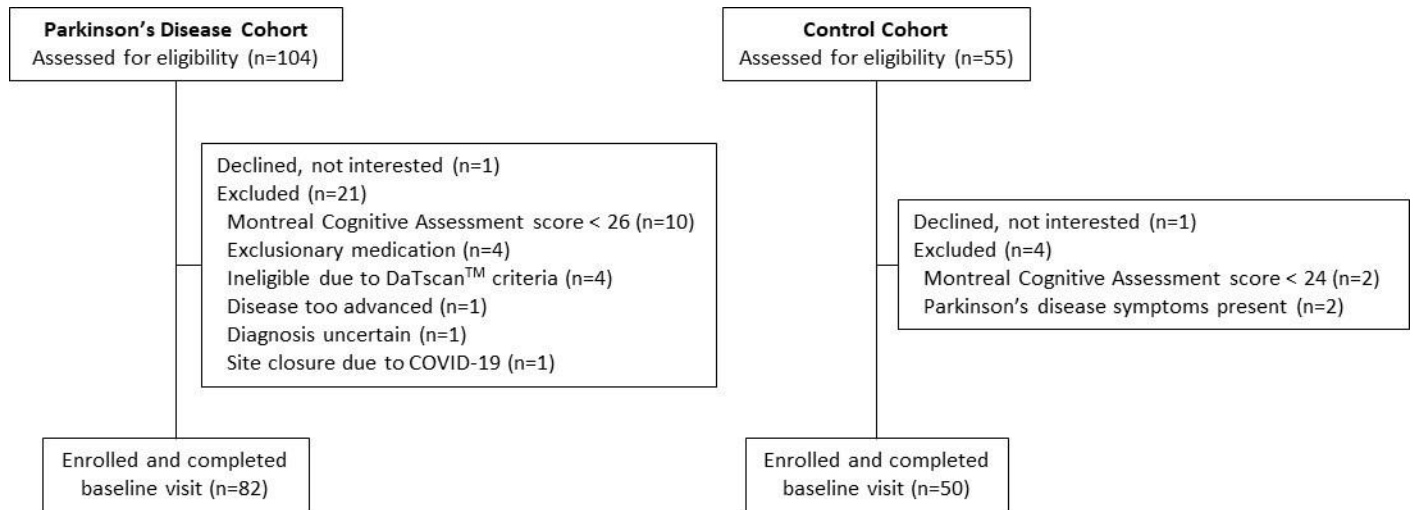

**Supplemental Table 1. Comparison of cognitive and speech performance on smartphone assessments between those with and without Parkinson’s disease**

|                                                                                             | PD cohort   | Control cohort | p-value |
|---------------------------------------------------------------------------------------------|-------------|----------------|---------|
| <b>Cognitive Assessments</b>                                                                |             |                |         |
| Trails Making Test Part A, s<br>(PD = 82, controls = 49)                                    | 54.4 (23.8) | 48.0 (36.0)    | <0.01   |
| Trails Making Test Part B, s<br>(PD = 82, controls = 49)                                    | 55.6 (24.0) | 48.6 (23.7)    | 0.11    |
| Symbol Digital Modalities Test, number correct<br>(PD = 82, controls = 49)                  | 18.3 (8.2)  | 20.3 (8.9)     | 0.05    |
| Visuospatial Working Memory Test, percent correct<br>(PD = 82, controls = 49)               | 71.2 (21.6) | 68.9 (26.7)    | 0.7     |
| <b>Speech Assessments</b>                                                                   |             |                |         |
| Reading task, semitone pitch range<br>(PD = 73, controls = 44)                              | 4.6 (1.2)   | 5.6 (1.2)      | <0.001  |
| Reading task, cepstral peak prominence<br>measure of vocal clarity (PD = 73, controls = 44) | 27.4 (0.8)  | 27.8 (0.7)     | 0.003   |
| Reading task, pause median length, log-transformed<br>(PD = 73, controls = 44)              | -1.5 (0.5)  | -1.8 (0.6)     | 0.02    |
| Phonation task, Mel Frequency Cepstral Coefficient 2<br>(PD = 51, controls = 40)            | 108.4 (17)  | 117.3 (17)     | 0.013   |

Results are mean (standard deviation)

PD = Parkinson’s disease

**Supplemental Table 2. Description and location of assessments conducted with the digital devices used in the study**

| Device                        | Assessment                                | Description                                                                                                                                                                 | Location                        |
|-------------------------------|-------------------------------------------|-----------------------------------------------------------------------------------------------------------------------------------------------------------------------------|---------------------------------|
| Wearable Sensors <sup>a</sup> | Timed Walk Test                           | The participant is timed while walking for a distance of 10 meters. The individual walks the 10-meter path back and forth, turning at the end of their path, for 2 minutes. | In-clinic                       |
|                               | Repeat Timed Walk Test with Serial Sevens | The participant repeats the Timed Walk Test described above. While walking, the participant performs a serial subtraction of sevens beginning with the number 100.          |                                 |
|                               | Sit-to-Stand Test                         | The participant sits against the back of a chair and stands up as quickly as they can for 5 repetitions without stopping.                                                   |                                 |
|                               | Postural Sway                             | The participant stands still, looking straight ahead for 30 seconds.                                                                                                        |                                 |
| Smartphone Application        | Symptom Tracker                           | The participant answers a 5-item survey on the phone including questions about mood, sleepiness, thinking, tremor severity, and difficulty with movement.                   | In-clinic and remotely biweekly |
|                               | Symbol Digit Modalities Test              | The participant is given a key that connects symbols to numbers. The participant is presented with a symbol and must speak aloud the corresponding number.                  |                                 |
|                               | Trail Making Test                         | The participant must connect a set of dots as quickly as possible using the index finger on their dominant hand while still maintaining accuracy.                           |                                 |
|                               | Visuospatial Working Memory               | The participant is briefly shown four colored boxes. The participant is then shown a single-colored box and must indicate if that box was in the previous set of four.      |                                 |
|                               | Finger Tapping                            | The participant performs rapid alternating finger movements by tapping two targets that appear side by side using their index and middle fingers.                           |                                 |
|                               | Fine Motor Test                           | The participant is presented with a pink object and an outline. The individual must use 1-2 fingers to move and rotate the object into the outline as quickly as possible.  |                                 |
|                               | Speech Assessment                         | Participants must perform a sustained phonation task, a verbal articulation task repeating the syllables “pa ta ka,” and a sentence reading task.                           |                                 |
| Smartwatch                    | Timed Walk Test                           | The participant must walk in a straight line, turning at the end of their path, for 1 minute.                                                                               | In-clinic and remotely biweekly |
|                               | Balance Test                              | The participant must stand still with their arms at their side for 30 seconds.                                                                                              |                                 |
|                               | Tremor Task                               | The participant must rest their hands in their lap for 10 seconds, then extend their arms out in front of them for 10 seconds.                                              |                                 |

<sup>a</sup>APDM sensors are also worn during the MDS-UPDRS part III and smartphone application tasks

**Supplemental Table 3. Sources of missing data**

| Domain      | Task                                | Explanation                                                                                                                                                                                                                                                                                                                                                                                                                        |
|-------------|-------------------------------------|------------------------------------------------------------------------------------------------------------------------------------------------------------------------------------------------------------------------------------------------------------------------------------------------------------------------------------------------------------------------------------------------------------------------------------|
| Gait        | Walking                             | About 25% of the missing smartphone data and 20% of the missing smartwatch data were because of unavailable files for analyses, whereas the remaining were the result of the gait analysis algorithms unable to generate metrics.                                                                                                                                                                                                  |
| Tremor      | Tremor                              | Missing passive tremor data were lost due to incorrectly configured permissions settings on the study phone.                                                                                                                                                                                                                                                                                                                       |
| Speech      | Phonation                           | iPhone settings during early data collections (mostly in PD participants) included a form of lossy compression (Speex), which treated sustained phonation as background noise and cancelled out the signal of interest, greatly impacting acoustic metrics. This issue did not affect other speech tasks (pataka, reading). This issue was resolved early in the trial by a software update that switched to lossless compression. |
|             | Reading                             | Audio recordings are missing for several subjects, likely due to early time out of the app session.                                                                                                                                                                                                                                                                                                                                |
| Psychomotor | Finger-Tapping                      | Missing data occurred due to issues with setting up the smartphone app at the Baseline visit that allowed the session to time out early.                                                                                                                                                                                                                                                                                           |
|             | Fine Motor                          |                                                                                                                                                                                                                                                                                                                                                                                                                                    |
| Cognition   | Trails A & B                        |                                                                                                                                                                                                                                                                                                                                                                                                                                    |
|             | Symbol Digit Modalities Test (SMDT) |                                                                                                                                                                                                                                                                                                                                                                                                                                    |
|             | Visuospatial Working Memory (VSWM)  |                                                                                                                                                                                                                                                                                                                                                                                                                                    |
